1 Sap flow through petioles and petiolules reveals leaf-level responses to light and vapor  
2 pressure deficit in the tropical tree *Tabebuia rosea* (Bignoniaceae)

3  
4 ADAM B. RODDY<sup>1</sup>, KLAUS WINTER<sup>2</sup>, TODD E. DAWSON<sup>1</sup>

5  
6  
7 <sup>1</sup>Department of Integrative Biology, University of California, Berkeley, CA, 94720 USA  
8 <sup>2</sup>Smithsonian Tropical Research Institute, Apartado 0843-03092, Balboa, Ancón,  
9 Republic of Panama

10

11

12 *Author of contact:*

13 Adam B. Roddy

14 3040 Valley Life Sciences Building #3140

15 Berkeley, CA 94720

16 USA

17 tel: +1 510 642 1054

18 fax: +1 510 643 6264

19 email: [adam.rodny@gmail.com](mailto:adam.rodny@gmail.com)

20

21

22

23

24

25 Keywords: transpiration, leaf hydraulics, hysteresis, tropics

26 Running title: LEAF-LEVEL SAP FLOW RESPONSES TO VPD AND LIGHT

27

28 This is an un-refereed author version that has been submitted for publication.

## 29**ABSTRACT**

30Continuous measurements of sap flow have been widely used to measure water flux  
 31through tree stems and branches. However, these measurements lack the resolution  
 32necessary for determining fine-scale, leaf-level responses to environmental variables.  
 33We used the heat ratio method to measure sap flow rates through leaf petioles and  
 34leaflet petiolules of saplings of the tropical tree *Tabebuia rosea* (Bignoniaceae) to  
 35determine how leaf and leaflet sap flow responds to variation in light and vapor pressure  
 36deficit (VPD). We found that in the morning sap flow rates to east-facing leaves  
 37increased 26 minutes before adjacent west-facing leaves. Although leaves had higher  
 38integrated sap flow than their largest leaflet, this difference was not proportional to the  
 39difference in leaf area, which could be due to lower conduit area in petiolules than in  
 40petioles. In contrast to measurements on main stems, integrated daily sap flow was  
 41negatively correlated with daily mean VPD. Furthermore, leaves exhibited previously  
 42undescribed patterns of hysteresis in the sap flow-VPD and sap flow-PAR relationships.  
 43When hysteresis in the sap flow-PAR relationship was clockwise, the sap flow-VPD  
 44relationship was also clockwise; however, when hysteresis in the sap flow-PAR  
 45relationship was counterclockwise, the sap flow-VPD relationship displayed an  
 46intersected loop. These pattern differences highlight how substantially leaf-level  
 47processes may vary within a canopy and how leaf-level processes may not scale  
 48predictably to the stem level.

49

50

51

52

## 53INTRODUCTION

54        Approximately 90% of all water converted from the liquid phase to the vapor  
55phase in terrestrial ecosystems moves through plants (Jasechko et al. 2013); in the  
56tropics this amounts to an estimated  $32 \times 10^{15}$  kg of water per year (Hetherington and  
57Woodward 2003). Almost all of this water transits through plant leaves. Understanding  
58how leaves respond to abiotic drivers is important for modeling efforts at scales from  
59leaves to landscapes (Jarvis and McNaughton 1986). At the leaf level, knowing which  
60drivers impact transpiration most under daily and seasonally varying conditions is critical  
61to understanding what may limit the distribution and abundance of species across the  
62globe.

63        Various sap flow methods are commonly used to estimate almost continuously  
64tree responses to environmental conditions for extended time periods (Marshall 1958,  
65Granier 1985, Burgess et al. 2001, Vandegehuchte and Steppe 2012). These  
66measurements are most often made on boles or large branches of trees and can be  
67used to estimate canopy-level responses to changing environmental conditions (Oren et  
68al. 1999a, Ewers and Oren 2000, Traver et al. 2010). Despite recent technical  
69advancements in using sap flow measurements in stems to estimate canopy processes,  
70a number of problems remain. First, resistance and capacitance in the hydraulic  
71pathway creates time lags in water movement between different points in the hydraulic  
72pathway (Köcher et al. 2013). For tropical trees, lags in sap flow between branches in  
73the canopy and the stem base can approach an hour (Meinzer et al. 2004). Second,  
74different parts of the canopy respond to environmental conditions largely independently  
75(Brooks et al. 2003), such that sap flow measurements on branches or boles may  
76provide only an average response of many leaves or branches. For example, east-  
77facing branches of *Sequoiadendron giganteum* reached their maximum daily sap flow  
78rates 6 hours before west-facing branches at the same height (Burgess and Dawson  
792008). Although sap flow measurements on boles and branches have provided useful

80 estimates of whole-tree water use (Wullschlegel et al. 1998), their utility for describing  
81 leaf-level processes can be limited by a variety of factors including time lags,  
82 capacitance, hydraulic resistance, and variation in these factors along the root-to-leaf  
83 continuum.

84       Rarely have researchers attempted to measure sap flow rates through petioles of  
85 individual leaves (Sheriff 1972). Recently, Clearwater (2009) adapted the heat ratio  
86 method (HRM; Burgess et al. 2001) originally used for measuring sap flow through large  
87 stems to measure sap flow through small diameter stems, fruit pedicels, and leaf  
88 petioles. Slight variations of this method have proven useful in measuring sap flux  
89 through petioles under field conditions in the neotropics (Roddy and Dawson 2012,  
90 2013, Goldsmith et al. 2013) and through stems of anatomically and phylogenetically  
91 diverse species of the South African fynbos flora (Skelton et al. 2013). These studies  
92 show that measuring sap flow directly adjacent to transpiring leaves can deepen our  
93 understanding of how leaves respond to variation in environmental conditions across a  
94 range of timescales. Placing sensors in close proximity to the transpiring leaves has the  
95 advantage of fine-scale measurements akin to leaf gas exchange without the  
96 disadvantage of enclosing leaves in a cuvette that removes the leaf boundary layer and  
97 otherwise modifies the leaf microenvironment.

98       Variation in sap flux is influenced by a variety of environmental conditions,  
99 including soil water availability, vapor pressure deficit (VPD), and solar radiation, and  
100 diurnal patterns may also vary seasonally (e.g. O'Grady et al. 1999, 2008, Zeppel et al.  
101 2004). Over diurnal cycles, a change in an environmental variable in the morning does  
102 not always produce an equivalent response in sap flow as it does in the afternoon.  
103 Such a pattern is termed hysteresis and has been commonly observed in the sap flow  
104 responses to light and VPD. For example, at a given VPD that occurs both in the  
105 morning and again in the afternoon, sap velocity is higher in the morning (when VPD is  
106 increasing) than in the afternoon (when VPD is decreasing), creating a clockwise

pattern of hysteresis throughout the day (Meinzer et al. 1997, O'Grady et al. 1999, Zeppel et al. 2004) that is consistent with hysteresis in canopy gas exchange (Takagi et al. 1998). Despite the ubiquity of hysteresis in sap flow data, its causes are rarely discussed. Hysteresis in a relationship indicates that factors other than the primary descriptor variable are constraining the response variable. For the relationship between sap flow and VPD, it is thought that hysteresis results from variation in hydraulic capacitance, resistance, or stomatal sensitivity to VPD (O'Grady et al. 1999). In the simplest case, no hysteresis in the sap flow-VPD relationship would mean that an increase and a decrease in VPD produce equivalent responses in sap flow and that there are no other factors influencing the sap flow response to VPD. However, a number of factors could cause deviation in the morning and the afternoon from this scenario of no hysteresis. First, trees often supply their morning transpiration from capacitive stores, which could elevate morning sap flow above that observed if there were no capacitance (Cowan 1972, Goldstein et al. 1998, Meinzer et al. 2004, 2008). Second, as stem water potential declines throughout the day, resistance in the hydraulic pathway increases, as is commonly observed in vulnerability curves (Meinzer et al. 2009), which could depress afternoon sap flow below that if there were no resistance. Both of these hydraulic factors, resistance and capacitance, could jointly be responsible for causing hysteresis in the sap flow-VPD relationship. Morning transpiration may draw largely on stored water, and as this hydraulic capacitor discharges, resistance may become important in depressing afternoon sap flow.

In contrast to VPD hysteresis, causes of hysteresis in the sap flow-light relationship are less clear. While the sap flow-VPD relationship commonly exhibits a clockwise pattern of hysteresis, the sap flow-light relationship generally exhibits a counterclockwise pattern (Meinzer et al. 1997, Zeppel et al. 2004). Zeppel et al. (2004) argued that counterclockwise hysteresis in the sap flow-light relationship results from the combination of (1) the difference in timing between peak light and peak VPD and (2)

different stomatal responses to light and to VPD. Because VPD reaches its daily peak a few hours after light reaches its daily maximum at solar noon, sap velocity will be higher in the afternoon, when VPD is higher and stomata are fully open. Zeppel et al. (2004) argue that stomatal conductance saturates at relatively low light levels in the morning, and that above this saturating light level, VPD becomes the predominant driver of transpiration and sap flow. These responses probably vary between leaves acclimated to different microenvironments (e.g. between sun- and shade-leaves).

Using sap flow measurements on main stems of canopy trees to test these hypotheses for the causes of hysteresis are thus fraught with potential problems that focusing on leaves may circumvent. For leaves, sap flow responses to VPD are often similar to those for stems, although under some conditions leaves show different patterns (Roddy and Dawson 2013). In addition to clockwise hysteresis in the responses to VPD, sap flow through petioles sometimes exhibits an intersected loop (or 'figure-eight') pattern in response to diurnal variation in VPD. Determining the sap flow responses to environmental variables of individual leaves provides an opportunity to better elucidate important dynamics of plant water use. Furthermore, incorporating explicit measurements of sap flow to individual leaves could help to improve upon methods for scaling up to whole canopy processes.

In the present study, we measured sap flow rates through petioles and petiolules of saplings of the tropical tree *Tabebuia rosea* (Bignoniaceae) to understand how sap flow responds to variation in light and VPD. Because the figure-eight pattern of hysteresis in the sap flow-VPD relationship reported by Roddy and Dawson (2013) may result from an interaction with light, we also measured photosynthetically active radiation (PAR) levels on each leaf or leaflet to determine the conditions under which different patterns of hysteresis may occur. We were particularly interested in examining the differences in sap flow patterns between adjacent leaves and between leaves and leaflets because different microenvironmental conditions may cause sap flow patterns to

161differ between leaves on the same stem. Furthermore, differences in sap flux through  
 162petioles and petiolules may reflect variation in hydraulic architecture. If the hydraulic  
 163pathway constricts downstream, then sap velocity must increase as it moves towards  
 164leaflets. Our results highlight how measuring sap flow rates to individual leaves could  
 165deepen our understanding of the linkages between hydraulic architecture and plant  
 166water use.

167

## 168**METHODS**

### 169**Plant Material**

170 *Tabebuia rosea* (Bignoniaceae) grows to become a canopy tree in the lowland  
 171forests of central Panama. While adults are often deciduous, seedlings are evergreen  
 172with five palmate leaflets of varying size encircling the petiole. Plants were grown from  
 173seed in 20-liter, insulated pots outdoors under a glass roof at the plant growth facilities  
 174of the Smithsonian Tropical Research Institute in Gamboa, Panama, until a few days  
 175before sap flow measurements were begun. When the tops of the plants were ~70 cm  
 176above the soil surface, they were transferred to a glass chamber to protect them from  
 177strong afternoon winds. The lower ~1 m of this chamber was made of cement painted  
 178white, and doors on east- and west-facing sides of the chamber were left ajar to allow  
 179air circulation. At the beginning of the sap flow measurements, the tops of the plants  
 180were even with the top of the cement wall at the base of the chamber, and during the  
 181course of the experiment two new sets of leaves were produced. Pots were kept well-  
 182watered except for one week when water was withheld to determine how sap flow rates  
 183would respond to declining soil water. This week coincided with a dramatic increase in  
 184VPD. Sensors were installed when plants were approximately eight months old, a few  
 185days after transferring them to the glass chamber.

186

### 187**Sap flow measurements**

188 On each measured leaf, sap flow sensors were installed on the leaf petiole and  
189 on the petiolule of the middle, largest leaflet. On each plant, two adjacent leaves on  
190 opposite sides of the plant were chosen for measurement. At the time of installation,  
191 these leaves were the newest, fully-expanded leaves on each plant. Plants were  
192 positioned so that the axis defined by the two measured leaves on each plant were  
193 oriented east-west. Of the total 12 sensors installed, five failed, leaving two sensors on  
194 petiolules and five sensors on petioles.

195 Sap flow sensors and measurements were based on the design and theory of  
196 Clearwater (2009) with some slight modifications described previously (Roddy and  
197 Dawson 2012, 2013) and again briefly here. Sensors were constructed from a silicone  
198 backing and were connected to 10 cm leads with Molex connectors that were then  
199 connected by 10 m leads to an AM16/32 multiplexer and CR23X datalogger (Campbell  
200 Scientific Inc., Logan, UT). Sensors were held in place with parafilm, and sensors and  
201 connections were insulated with multiple layers of bubblewrap and aluminum foil at least  
202 cm above and below the sensor. Consistent with previous applications of the HRM,  
203 we measured initial temperatures for 10 seconds prior to firing a 4-second heat pulse,  
204 monitored temperatures every 2 seconds for 200 seconds after the heat pulse, and  
205 initiated the measurement routine every 10 minutes.

206 The heat pulse velocity,  $v_h$  (cm s<sup>-1</sup>), was calculated from the temperature ratio as:  
207

$$v_h = \frac{k}{x} \ln \left( \frac{\delta T_1}{\delta T_2} \right)$$

208 where  $v_h$  is the heat pulse velocity in cm s<sup>-1</sup>,  $k$  is the thermal diffusivity (cm<sup>2</sup> s<sup>-1</sup>),  $x$  is the  
209 distance from the heater to each of the thermocouples (cm), and  $\delta T_1$  and  $\delta T_2$  are the  
210 temperature rises (°C) above and below the heater, respectively (Marshall 1958,  
211 Burgess et al. 2001, Clearwater et al. 2009). We estimated the thermal diffusivity as:  
212

$$k = \frac{x^2}{4t_m}$$



where  $t_m$  is the time (seconds) between the heat pulse and the maximum temperature rise recorded  $x$  cm above or below the heater under conditions of zero sap flow (Clearwater et al. 2009). We measured  $t_m$  every morning before dawn when atmospheric vapor pressures were lowest (between 0500 and 0600 hrs). At this time, the vapor pressure deficit was almost always below 0.3 kPa, and therefore we assumed  $v_h$  was approximately zero. Thermal diffusivity,  $k$ , was calculated for each thermocouple (upstream and downstream) from these predawn measurements of  $t_m$ , averaged for each sensor, and used to calculate  $v_h$  from the heat ratios for the subsequent 24 hours. Measurements of  $k$  on nights with VPD always above 0.3 kPa were discarded and replaced with the most recently measured  $k$  when VPD < 0.3 kPa. We estimated the temperature ratio under zero-flow conditions by excising petioles and petiolules above and below the sensor at predawn at the end of the experiment, greasing the cut ends, placing the segments in a darkened box, and recording the temperature ratios for the subsequent ~4 hours. The average of these zero-flow temperature ratios corresponded very well with the temperature ratios recorded predawn under low VPD (less than ~0.3 kPa) conditions. The sensor-specific average temperature ratio under zero-flow conditions was subtracted from all calculated heat ratios. This corrected heat ratio was then used to calculate  $v_h$ .

231

## 232 **Measurements of light and vapor pressure deficit**

Light measurements were made using S1787 photodiodes (Hamamatsu Photonics, Hamamatsu City, Japan). Photodiodes were connected to 15 cm long copper wires with Molex connectors and then to 10 m leads, which were connected to a CR5000 datalogger measuring in differential mode. Circuits created by each photodiode were closed with a 100 Ohm resistor. Photodiodes were installed just above each leaflet with a sap flow sensor, and the photodiode was positioned to be parallel to the axis of the central vein of the leaflet. Light measurements were made every minute and averaged

every 10 minutes. Voltage measurements from the photodiodes were converted to PAR based on a calibration of all photodiodes against a PAR sensor (LI-SB190, LiCor Biosciences, Logan, UT), during which time all sensors were situated adjacent to each other in a clearing that received full sunlight.

Vapor pressure deficit was calculated from temperature and relative humidity measurements made every 10 minutes with a HOBO U23 datalogger (Onset Computer Corp., Bourne, MA) that was housed in a covered, white, PVC, Y-shaped tube and hung level with the tops of the plants.

## **Data analysis**

All analyses were performed using R (R Core Team 2012). Raw velocity measurements were processed following previously published methods (Roddy and Dawson 2012, 2013, Skelton et al. 2013). Measurements of  $v_h$  were smoothed using the 'loess' function, which fits a polynomial to a subset of the data in a moving window of 35 points.

For analyses of structure (leaf vs. leaflet) or aspect (east- vs. west-facing leaves), sap flow measurements from individual sensors in each group were averaged. To estimate the total sap flow during the day and night, we integrated the time course of  $v_h$  measurements for each day and night using the 'auc' function in the package *MESS*, which calculates the area under the curve using the trapezoid rule. Daytime was defined as being between 600 and 1800 hours, which corresponded to morning and evening twilight. To minimize the effects of nocturnal refilling, we defined nighttime as being between 100 and 600 hours, which assumed that diurnal water potential declines had mostly recovered within seven hours after sunset. To analyze the effects of VPD on integrated sap flow rates, we linearly regressed integrated sap flow against mean VPD. In all regressions for leaves and leaflets in the day and in the night, the linear model

was determined to be as good or better than both the logarithmic and power functions by comparing the residual standard errors.

Differences in the timing of morning sap flow between east- and west-facing leaves were compared at a critical  $v_h$  of 1.5 cm hr<sup>-1</sup>. We chose this critical value because it was higher than any measured nighttime velocities and lower than most daytime velocities. We estimated the time at which  $v_h = 1.5$  cm hr<sup>-1</sup> by assuming a linear relationship ( $y = mx + b$ ) between the two sequential morning measurements that spanned  $v_h$  of 1.5 cm hr<sup>-1</sup>. To compare east- versus west-facing leaves and leaves versus leaflets, we used linear mixed effect models with day as the random variable, which accounts for repeated measures.

## RESULTS

Daily maximum VPD varied from 2.8 kPa to 6.9 kPa during the experiment, while daily maximum PAR at the top of the canopy varied from 1125 to 1640  $\mu\text{mol m}^{-2} \text{sec}^{-1}$ . The daily maximum sap flow rate through petioles varied between 1.4 cm hr<sup>-1</sup> to 4.5 cm hr<sup>-1</sup>. This lowest daily maximum  $v_h$  occurred at the end of a week without water, during which time five of the seven hottest, driest days occurred. Nighttime  $v_h$  through petioles varied throughout the study, but was always below 1.0 cm hr<sup>-1</sup> and below 0.5 cm hr<sup>-1</sup> on all but seven nights. Overall, thermal diffusivity,  $k$ , ranged from 0.00136 to 0.00170 cm<sup>2</sup> s<sup>-1</sup>. There were slight differences in  $k$  between sensors, but  $k$  was relatively constant throughout the experiment for each sensor, consistent with previously reported values for  $k$  from a diverse set of plant structures and species (Clearwater et al. 2009, Roddy and Dawson 2012, 2013, Skelton et al. 2013).

On every morning, sap flow rates to east-facing leaves increased more quickly than did sap flow rates to west-facing leaves. East-facing leaves had sap flow rates of 1.5 cm hr<sup>-1</sup> on average 26 minutes before sap flow rates to west-facing leaves reached the same threshold ( $t = 5.67$ ,  $df = 23$ ,  $P < 0.001$ ; Figure 1). In addition, on 18 out of 25

293 days, west-facing leaves reached their daily peak sap flow rate later in the day than  
294 east-facing leaves. However, sap flow rates to east-facing leaves did not decline any  
295 earlier in the evening than west-facing leaves, and east-facing leaves generally had  
296 higher nighttime sap flow rates than west-facing leaves, perhaps indicative of greater  
297 refilling.

298       Patterns of sap flow to leaves and leaflets also differed. Leaflets generally had  
299 lower sap flow rates than leaves, and the daily integrated sap flow through petioles and  
300 petiolules differed significantly ( $t = 7.42$ ,  $df = 24$ ,  $P < 0.001$ ; Figure 2). While water was  
301 withheld for one week, daily maximum sap velocities for both leaves and leaflets  
302 declined such that leaflet sap flow rates were about half of those to leaves (Figure 2a).  
303 On the day immediately following re-watering, leaves and leaflets had almost equivalent  
304 sap flow rates, which continued to increase on subsequent days despite declining daily  
305 maximum VPD during these days. Daytime integrated sap flow to leaves and leaflets  
306 was negatively correlated with mean VPD (Figure 3), both when including all days and  
307 when the last five days of the drought treatment were excluded (Table 1). There was a  
308 significant, negative relationship only between nighttime integrated sap flow of leaflets  
309 and mean nighttime VPD, but only when all data, including the drought days, were  
310 included. There was no relationship between nighttime VPD and integrated sap flow for  
311 leaves. Maximum  $v_h$  for leaves occurred at a slightly higher VPD than it did for leaflets  
312 (2.21 kPa vs. 2.06 kPa; grey symbols in Figure 3).

313       Patterns of sap flow hysteresis can be grouped into two classes, exemplified by  
314 data from two days from the same leaf shown in Figure 4. Data in Figure 4 are  
315 consistent with the patterns seen for other sensors on other days. The first type of  
316 hysteresis pattern is denoted by clockwise hysteresis in the relationship between  $v_h$  and  
317 VPD (Figure 4a). On this day, hysteresis in the  $v_h$ -PAR relationship was also clockwise  
318 (Figure 4b). The second type of hysteresis is defined by an intersected loop, or figure-  
319 eight pattern, in the relationship between  $v_h$  and VPD (Figure 4d). On this day, the  $v_h$ -

320 PAR relationship had a counterclockwise pattern (Figure 4e). Nonetheless, the  
321 relationship between PAR and VPD for these two days was similar, showing a  
322 counterclockwise pattern for both days (Figure 4c,f).

323

324

## 325 **DISCUSSION**

326 Leaf physiology responds rapidly to changes in the leaf microenvironment in  
327 ways not previously appreciated (Zhang et al. 2013), and leaves may protect stems  
328 from low water potentials that can lead to loss of xylem functioning (Sperry 1986, Hao et  
329 al. 2008, Chen et al. 2009, 2010, Johnson et al. 2011, Bucci et al. 2012, Zhang et al.  
330 2013). As a result, there has been burgeoning interest in the diurnal variability of leaf  
331 hydraulic functioning (Brodribb and Holbrook 2004, 2007, Johnson et al. 2009, Johnson  
332 et al. 2011, Wheeler et al. 2013). The new techniques for measuring leaf-level sap flow  
333 used here may become critical in quantifying diurnal variability in leaf functioning. Our  
334 results highlight how water use can differ significantly even between adjacent leaves,  
335 further justifying the need for fine-scale measurements like ours in quantifying leaf  
336 responses to environmental drivers. Notably, our sap flow measurements on individual  
337 leaves suggest that there may be important functional linkages between hydraulic  
338 architecture and water use. While a number of studies have shown these linkages for  
339 stems, substantially fewer attempts have been made to connect leaf hydraulic  
340 architecture to water use under natural conditions.

341 East- and west-facing leaves showed a number of differences in their patterns of  
342 daily sap flow (Figure 1a). Midday depression of  $v_h$  occurred in leaves on both sides of  
343 the plant, although not always at the same time of day, probably due to a combination of  
344 factors including differences in leaf energy balance and differences in the temporal and  
345 spatial dynamics of leaf water potential changes. Furthermore, aspect significantly  
346 affected the timing and rates of sap flow. Sap flow rates to east-facing leaves

increased, on average, 26 minutes earlier in the morning than they did to west-facing leaves, due to earlier increases in leaf-level PAR to east-facing leaves than to west-facing leaves. Despite these differences in timing, leaf hydraulic conductance of east- and west-facing leaves may be similar if higher transpiration rates in east-facing leaves are accompanied by greater declines in leaf water potential. Leaf microclimatic conditions can cause substantial differences between even adjacent leaves on the same branch (Figure 1), which can influence the dynamics of branch sap flow (Burgess and Dawson 2008). How much influence water use by one leaf may have on water use by another, adjacent leaf is likely related to xylem hydraulic architecture. In addition to flowing longitudinally from roots to leaves, water may also flow laterally within a stem (MacKay and Weatherley 1973, James et al. 2003, Schulte and Costa 2010). The degree of this lateral flow varies among species and results from lateral connections between adjacent xylem vessels. Highly sectorized xylem leads to close coupling of water uptake by roots on one side of the plant and water use by leaves on the same side of the plant. In this case, adjacent leaves on different sides of the plants would draw upon largely different pools of water in the stem. High sectoriality in xylem architecture allows plant parts to function independently, such that branches or leaves may compete little for water (Brooks et al. 2003, Orians et al. 2005). In contrast, highly integrated xylem (low sectoriality) leads to tighter hydraulic linkages between adjacent leaves on different sides of the stem axis. While we do not know how well integrated the xylem of adjacent leaves in *T. rosea* may be, orthostichous leaves (vertically aligned along the shoot axis) generally have more interconnected vasculature than do non-orthostichous leaves (those on different sides of a shoot; Watson and Casper 1984, Orians et al. 2005). Thus, adjacent east- and west-facing *T. rosea* leaves probably function more independently than would two east-facing, orthostichous leaves. Sap flow to individual leaves varies among leaves on the same branch, and the magnitude of this variation may itself vary among species depending on xylem architecture.

374 Patterns of sap flow through petioles were similar to patterns observed for  
 375 petioles of other tropical species (Roddy and Dawson 2012, 2013), but, in some cases,  
 376 different from patterns observed for main stems. On some days, patterns of hysteresis  
 377 in the  $v_h$ -VPD relationship were similar to those seen for main stems of canopy trees  
 378 (Meinzer et al. 1997, O'Grady et al. 1999, 2008, Zeppel et al. 2004; Figure 4a). In this  
 379 type of hysteresis,  $v_h$  was higher in the morning than in the afternoon for a given VPD,  
 380 creating a clockwise loop in the relationship between  $v_h$  and VPD. On days when the  $v_h$ -  
 381 VPD relationship showed a clockwise loop, the  $v_h$ -PAR relationship also had a clockwise  
 382 hysteresis loop (Figure 4b). In contrast, for main stems, a clockwise  $v_h$ -VPD loop is  
 383 normally accompanied by a counterclockwise  $v_h$ -PAR loop (Zeppel et al. 2004). On  
 384 days with this first type of hysteresis,  $v_h$  was higher in the morning than in the afternoon,  
 385 with maximum daily  $v_h$  occurring closer in time to peak PAR than to peak VPD. On  
 386 these days, PAR peaked early in the day, saturating stomatal conductance and leading  
 387 to high  $v_h$  even when VPD was moderate. However, we observed a second type of  
 388 hysteresis, characterized by a counterclockwise loop in the  $v_h$ -PAR relationship (Figure  
 389 4e) that, unlike for main stems, was accompanied by a markedly different relationship  
 390 between  $v_h$  and VPD. When the  $v_h$ -PAR relationship exhibited counterclockwise  
 391 hysteresis, the  $v_h$ -VPD relationship was characterized by an intersected loop, or figure-  
 392 eight (Figure 4d). Although this intersected loop has been reported previously for main  
 393 stems (Meinzer et al. 1999, O'Grady et al. 1999, 2008), its meaning has not been fully  
 394 discussed or understood. This pattern occurred when afternoon  $v_h$  was higher than  
 395 morning  $v_h$ , causing maximum daily  $v_h$  to occur closer in time to peak daily VPD than to  
 396 peak daily PAR. If morning transpiration is low and does not result in substantial water  
 397 potential declines, then  $v_h$  may peak in the afternoon when VPD peaks, as occurred on  
 398 the second day shown. Why morning sap flow on this day was so low remains unclear  
 399 but may be due to low water potentials, which we did not measure. Regardless, this  
 400 second type of hysteresis exhibiting an intersected loop requires (1) a bimodal peak in

the daily  $v_h$  pattern (i.e. midday depression of gas exchange, which commonly occurs in tropical species) and (2) maximum daily  $v_h$  to occur in the afternoon. Because slight midday depression of  $v_h$  occurred on both days shown in Figure 4, midday depression alone may not lead to the intersected loop hysteresis. The second day did, however, have a higher afternoon VPD both in absolute terms (maximum of 4.77 compared to 3.44 kPa) and relative to PAR (Figure 4c,f), which was probably partly responsible for increased afternoon transpiration.

The most probable cause underlying such different patterns of hysteresis for individual leaves and for main stems is likely to be a matter of scale. Sap flow through stems integrates the individual sap flow responses of many leaves in drastically different microclimates. One of the most obvious sources of within-canopy variation is between different parts of a plant canopy that undergo different diurnal patterns of incident PAR, yet measurements on main stems ignore most of this within-canopy variation. In the present study, leaf aspect influenced patterns of sap flow, and previous studies on branches have shown that aspect influences both absolute rates of sap flow and the timing of peak sap flow within the day (Steinberg et al. 1990, Akilan et al. 1994, Martin et al. 2001, Alarcón et al. 2003, Burgess and Dawson 2008; Figure 1). Time lags between daily peaks of sap flow for east- and west-facing branches of large trees would result in different patterns of hysteresis depending on branch aspect (Burgess and Dawson 2008), and these patterns for branches may be similar to the second type of hysteresis (the figure-eight) we report for individual leaves. By measuring incident PAR to each leaf, we attempted in the present study to account for some of the variation in leaf microclimate that influences sap flow. However, we still ignored some important factors, such as leaf temperature and its effects on leaf saturation vapor pressure and the vapor pressure gradient (VPG) driving transpiration. This may be an acceptable oversight because atmospheric humidity has a greater impact on stomatal conductance than does leaf temperature (Fredeen and Sage 1999, Mott and Peak 2010). In addition



to microclimatic variation, leaves and stems differ in their hydraulic architecture, which could influence sap flow patterns and hysteresis. Leaf water balance changes rapidly as efflux and influx of water vary asynchronously on the timescale of seconds (Sheriff and Sinclair 1973, Sheriff 1974). Water balance of stems may not change as rapidly, however, because of the compensatory effects of having numerous parallel pathways for water entry and loss. Thus, transpiration and sap flow may vary over much shorter timescales for leaves than for stems. Examining and quantifying sap flow hysteresis may provide new insights into hydraulic functioning in response to various abiotic factors influencing transpiration (Zeppel et al. 2004, Pfautsch and Adams 2013, Roddy and Dawson 2013).

Integrated daily plant water use, as measured by sap flow, generally increases with increasing mean and maximum daily VPD for plants from a wide variety of habitats, including canopy trees and shrubs (e.g. Zeppel et al. 2004, Pfautsch and Adams 2013, Skelton et al. 2013). However, in our experiment integrated daily leaf water use decreased with increasing mean daily VPD (Figure 3), whether days of declining soil water content were included in the analysis or not (Table 1). There was a significant negative relationship between integrated nocturnal sap flow and VPD for leaflets, but not for leaves, although this relationship was driven by very low nighttime sap flow during the drought (Table 1). For both leaves and leaflets, the VPD at which maximum daily  $v_h$  occurred was remarkably well conserved across days (2.21 and 2.06 kPa, respectively) and was, interestingly, the same whether maximum  $v_h$  occurred in the morning or in the afternoon (Figure 4a,d). These patterns opposite to those seen in main stems may result from higher than normal VPDs during our experiment. Leaves of *T. rosea* saplings may rarely encounter such high daytime VPD under natural conditions, and stomatal sensitivity to VPD may be responsible for the negative relationship we observed (Oren et al. 1999b). At VPD above ~2 kPa, instantaneous sap flow rates often declined, consistent with stomatal closure to regulate transpiration rate

455and leaf water potential. For *T. rosea* saplings, the VPD at maximum  $v_h$  was higher than  
456the VPD at maximum  $g_s$  of other species, perhaps because of the higher than normal  
457VPD during our experiment and the time lag between reaching maximum  $g_s$  and  
458maximum  $v_h$  due to hydraulic resistance.

459 In response to declining soil water availability, daily maximum  $v_h$  declined for both  
460leaves and leaflets despite increasing VPD during this time. Rewatering caused an  
461immediate increase in leaflet  $v_h$ , such that it almost equaled leaf  $v_h$  (Fig. 2).  
462Nonetheless, integrated leaflet sap flow was, on average, 30% less than leaf sap flow.  
463Assuming the ratio of leaflet area to conduit cross-sectional area (LA:SA ratio) is the  
464same for all leaflets, then instantaneous and integrated leaflet sap flow, as a fraction of  
465leaf sap flow, should be proportional to leaflet area. However, both instantaneous and  
466integrated leaflet sap flow were higher than this prediction, probably because cross-  
467sectional conduit area of petiolules is lower than that of petioles. This could result from  
468a combination of conduit taper and differences in the number of conduits between ranks  
469(McCulloh et al. 2009, 2010). Although we did not measure conduit dimensions, our  
470results highlight the potential linkages between leaf hydraulic architecture and diurnal  
471patterns of water use at different scales. As of yet, there has been remarkably little  
472effort to connect xylem structure-function relationships to continuous, sap flow  
473measurements of plant water use.

474

475

## 476CONCLUSIONS

477 Understanding leaf-level responses to abiotic conditions is critical for modeling  
478plant responses to future climate change. In the present study, we found that leaves  
479often exhibit sap flow responses to abiotic drivers that are notably different from  
480responses of stems, for two main reasons: (1) stems integrate over many leaves, each  
481with their own microclimate and (2) moving the sap flow sensor closer to the sites of

transpiration removes the confounding influence of capacitance distal to most stem or branch sap flow sensors. Thus, sap flow measurements on main stems may not accurately describe leaf-level processes. Furthermore, we found significant variation in sap flow patterns between adjacent leaves that are related to differences in the leaf microenvironment. Differences in sap flow between leaves and leaflets are likely due to differences in hydraulic architecture that influence patterns of water use. Future measurements of sap flow through petioles could better elucidate the biotic and abiotic drivers of transpiration dynamics under natural growth conditions.

## **ACKNOWLEDGMENTS**

Alexander Cheesman, Jorge Aguilar, Anna Schürkmann, Kevin Tu, and Joseph Wright provided technical assistance, and Daniel Johnson provided useful comments on a previous version of the manuscript.

## **FUNDING**

This work was supported by grants from the American Philosophical Society and the Smithsonian Tropical Research Institute and a National Science Foundation Graduate Research Fellowship to A.B.R.

## 501 REFERENCES

- 502 Akilan K, Considine JA, Marshall JK (1994) Water use by Geraldton wax  
503 (*Chamelaucium uncinatum* Schauer) as measured by heat balance stem flow  
504 gauges. New Zealand Journal of Crop and Horticultural Science 22:285-294.
- 505 Alarcón JJ, Domingo R, Green SR, Nicolás E, Torrecillas A (2003) Estimation of  
506 hydraulic conductance within field-grown apricot using sap flow measurements.  
507 Plant and soil 251:125-135.
- 508 Brodribb TJ, Holbrook NM (2004) Diurnal depression of leaf hydraulic conductance in a  
509 tropical tree species. Plant Cell Environ 27:820-827.
- 510 Brodribb J, Holbrook M (2007) Forced depression of leaf hydraulic conductance in situ:  
511 effects on the leaf gas exchange of forest trees. Functional Ecology 21:705-712.
- 512 Brooks RJ, Schulte PJ, Bond BJ, Coulombe R, Domec JC, Hinckley TM, McDowell N,  
513 Phillips N (2003) Does foliage on the same branch compete for the same water?  
514 Experiments on Douglas-fir trees. Trees-Structure and Function 17:101-108.
- 515 Bucci SJ, Scholz FG, Campanello PI, Montti L, Jimenez-Castillo M, Rockwell FA,  
516 Manna LL, Guerra P, Bernal PL, Troncoso O, Enricci J, Holbrook MN, Goldstein  
517 G (2012) Hydraulic differences along the water transport system of South  
518 American Nothofagus species: do leaves protect the stem functionality? Tree  
519 Physiol 32:880-893.
- 520 Burgess SS, Adams MA, Turner NC, Beverly CR, Ong CK, Khan AA, Bleby TM (2001)  
521 An improved heat pulse method to measure low and reverse rates of sap flow in  
522 woody plants. Tree Physiol 21:589-598.
- 523 Burgess SSO, Dawson TE (2008) Using branch and basal trunk sap flow  
524 measurements to estimate whole-plant water capacitance: a caution. Plant and  
525 Soil 305:5-13.

- 526Chen JW, Zhang Q, Li XS, Cao KF (2009) Independence of stem and leaf hydraulic  
527 traits in six Euphorbiaceae tree species with contrasting leaf phenology. *Planta*  
528 230:459-468.
- 529Chen JW, Zhang Q, Li XS, Cao KF (2010) Gas exchange and hydraulics in seedlings of  
530 *Hevea brasiliensis* during water stress and recovery. *Tree Physiol* 30:876-885.
- 531Clearwater MJ, Luo Z, Mazzeo M, Dichio B (2009) An external heat pulse method for  
532 measurement of sap flow through fruit pedicels, leaf petioles and other small-  
533 diameter stems. *Plant Cell Environ* 32:1652-1663.
- 534Cowan IR(1972) An electrical analogue of evaporation from, and flow of water in plants.  
535 *Planta* 106:221-226.
- 536Ewers BE, Oren R (2000) Analyses of assumptions and errors in the calculation of  
537 stomatal conductance from sap flux measurements. *Tree Physiol* 20:579-589.
- 538Fredeen AL, Sage RF (1999) Temperature and humidity effects on branchlet gas-  
539 exchange in white spruce: an explanation for the increase in transpiration with  
540 branchlet temperature. *Trees* 14:161-168.
- 541Goldsmith GR, Matzke NJ, Dawson TE (2013) The incidence and implications of clouds  
542 for cloud forest plant water relations. *Ecol Lett* 16:307-314.
- 543Goldstein G, Andrade JL, Meinzer FC, Holbrook NM, Cavelier J, Jackson P, Celis A  
544 (1998) Stem water storage and diurnal patterns of water use in tropical forest  
545 canopy trees. *Plant Cell Environ* 21:397-406.
- 546Granier A(1985) Une nouvelle méthode pour la mesure du flux de sève brute dans le  
547 tronc des arbres. *Annales des Sciences Forestieres* 42:193-200.
- 548Hao GY, Hoffmann WA, Scholz FG, Bucci SJ, Meinzer FC, Franco AC, Cao KF,  
549 Goldstein G (2008) Stem and leaf hydraulics of congeneric tree species from  
550 adjacent tropical savanna and forest ecosystems. *Oecologia* 155:405-415.
- 551Hetherington AM, Woodward FI (2003) The role of stomata in sensing and driving  
552 environmental change. *Nature* 424:901-908.

553 James SA, Meinzer FC, Goldstein G, Woodruff D, Jones T, Restom T, Mejia M,  
554 Clearwater M, Campanello P (2003) Axial and radial water transport and internal  
555 water storage in tropical forest canopy trees. *Oecologia* 134:37-45.

556 Jarvis PG, McNaughton KG (1986) Stomatal control of transpiration: scaling up from  
557 leaf to region. *Advances in ecological research* 15:1-49.

558 Jasechko S, Sharp ZD, Gibson JJ, Birks SJ, Yi Y, Fawcett PJ (2013) Terrestrial water  
559 fluxes dominated by transpiration. *Nature* 496:347-350.

560 Johnson DM, McCulloh KA, Meinzer FC, Woodruff DR, Eissenstat DM (2011) Hydraulic  
561 patterns and safety margins, from stem to stomata, in three eastern U.S. tree  
562 species. *Tree Physiol* 31:659-668.

563 Johnson DM, Meinzer FC, Woodruff DR, McCulloh KA (2009) Leaf xylem embolism,  
564 detected acoustically and by cryo-SEM, corresponds to decreases in leaf  
565 hydraulic conductance in four evergreen species. *Plant Cell Environ* 32:828-836.

566 Köcher P, Horna V, Leuschner C (2013) Stem water storage in five coexisting temperate  
567 broad-leaved tree species: significance, temporal dynamics and dependence on  
568 tree functional traits. *Tree Physiol* 33:817-832.

569 MacKay JFG, Weatherley PE (1973) The effects of transverse cuts through the stems of  
570 transpiring woody plants on water transport and stress in the leaves. *J Exp Bot*  
571 24:15-28.

572 Marshall DC (1958) Measurement of sap flow in conifers by heat transport. *Plant Physiol*  
573 33:385-396.

574 Martin TA, Brown KJ, Kučera J, Meinzer FC, Sprugel DG, Hinckley TM (2001) Control of  
575 transpiration in a 220-year-old *Abies amabilis* forest. *Forest Ecology and*  
576 *Management* 152:211-224.

577 McCulloh K, Sperry JS, Lachenbruch B, Meinzer FC, Reich PB, Voelker S (2010)  
578 Moving water well: comparing hydraulic efficiency in twigs and trunks of

579 coniferous, ring-porous, and diffuse-porous saplings from temperate and tropical  
580 forests. *New Phytol* 186:439-450.

581 McCulloh KA, Sperry JS, Meinzer FC, Lachenbruch B, Atala C (2009) Murray's law, the  
582 'Yarrum' optimum, and the hydraulic architecture of compound leaves. *New*  
583 *Phytol* 184:234-244.

584 Meinzer FC, Goldstein G, Franco AC, Bustamante M, Iglér E, Jackson P, Caldas L,  
585 Rundel PW (1999) Atmospheric and hydraulic limitations on transpiration in  
586 Brazilian cerrado woody species. *Functional Ecology* 13:273-282.

587 Meinzer FC, Hinckley TM, Ceulemans R (1997) Apparent responses of stomata to  
588 transpiration and humidity in a hybrid poplar canopy. *Plant Cell Environ* 20:1301-  
589 1308.

590 Meinzer FC, James SA, Goldstein G (2004) Dynamics of transpiration, sap flow and use  
591 of stored water in tropical forest canopy trees. *Tree Physiol* 24:901-909.

592 Meinzer FC, Johnson DM, Lachenbruch B, McCulloh KA, Woodruff DR (2009) Xylem  
593 hydraulic safety margins in woody plants: coordination of stomatal control of  
594 xylem tension with hydraulic capacitance. *Functional Ecology* 23:922-930.

595 Meinzer FC, Woodruff DR, Domec JC, Goldstein G, Campanello PI, Gatti MG,  
596 Villalobos-Vega R (2008) Coordination of leaf and stem water transport  
597 properties in tropical forest trees. *Oecologia* 156:31-41.

598 Mott KA, Peak D (2010) Stomatal responses to humidity and temperature in darkness.  
599 *Plant Cell Environ* 33:1084-1090.

600 O'Grady AP, Eamus D, Hutley LB (1999) Transpiration increases during the dry season:  
601 patterns of tree water use in eucalypt open-forests of northern Australia. *Tree*  
602 *Physiol* 19:591-597.

603 Oren R, Phillips N, Ewers BE, Pataki DE, Megonigal JP (1999a) Sap-flux-scaled  
604 transpiration responses to light, vapor pressure deficit, and leaf area reduction in  
605 a flooded *Taxodium distichum* forest. *Tree Physiol* 19:337-347.

- 606 Oren R, Sperry JS, Katul GG, Pataki DE, Ewers BE, Phillips N, Schäfer KVR (1999b)  
607 Survey and synthesis of intra-and interspecific variation in stomatal sensitivity to  
608 vapour pressure deficit. *Plant Cell Environ* 22:1515-1526.
- 609 Orians CM, Smith SD, Sack L (2005) How are leaves plumbed inside a branch?  
610 Differences in leaf-to-leaf hydraulic sectoriality among six temperate tree species.  
611 *J Exp Bot* 56:2267-2273.
- 612 O'Grady AP, Worledge D, Battaglia M (2008) Constraints on transpiration of *Eucalyptus*  
613 *globulus* in southern Tasmania, Australia. *Agricultural and Forest Meteorology*  
614 148:453-465.
- 615 Pfautsch S, Adams MA (2013) Water flux of *Eucalyptus regnans*: defying summer  
616 drought and a record heatwave in 2009. *Oecologia* 172:317-326.
- 617 R Core Team (2012) R Foundation for Statistical Computing, Vienna, Austria  
618 <<http://www.R-project.org/>>.
- 619 Roddy AB, Dawson TE (2012) Determining the water dynamics of flowering using  
620 miniature sap flow sensors. *Acta Horticulturae* 951:47-53.
- 621 Roddy AB, Dawson TE (2013) Novel patterns of hysteresis in the response of leaf-level  
622 sap flow to vapor pressure deficit. *Acta Horticulturae* 991:261-267.
- 623 Schulte PJ, Costa DG (2010) Xylem anisotropy and water transport--a model for the  
624 double sawcut experiment. *Tree Physiol* 30:901-913.
- 625 Sheriff DW (1972) A new apparatus for the measurement of sap flux in small shoots with  
626 the magnetohydrodynamic technique. *J Exp Bot* 23:1086-1095.
- 627 Sheriff DW (1974) Fluctuations in water uptake into and vapour efflux from leaves. *J*  
628 *Exp Bot* 25:580-582.
- 629 Sheriff DW, Sinclair R (1973) Fluctuations in leaf water balance, with a period of 1 to 10  
630 minutes. *Planta* 113:215-228.



631 Skelton RP, West AG, Dawson TE, Leonard JM (2013) External heat-pulse method  
632 allows comparative sapflow measurements in diverse functional types in a  
633 Mediterranean-type shrubland in South Africa. *Functional Plant Biology* 40:1076  
634 Sperry JS (1986) Relationship of xylem embolism to xylem pressure potential, stomatal  
635 closure, and shoot morphology in the palm *Rhapis excelsa*. *Plant Physiol* 80:110-  
636 116.

637 Steinberg SL, McFarland MJ, Worthington JW (1990) Comparison of trunk and branch  
638 sap flow with canopy transpiration in pecan. *J Exp Bot* 41:653-659.

639 Takagi K, Tsuboya T, Takahashi H (1998) Diurnal hystereses of stomatal and bulk  
640 surface conductances in relation to vapor pressure deficit in a cool-temperate  
641 wetland. *Agricultural and Forest Meteorology* 91:177-191.

642 Traver E, Ewers BE, Mackay DS, Loranty MM (2010) Tree transpiration varies spatially  
643 in response to atmospheric but not edaphic conditions. *Functional Ecology*  
644 24:273-282.

645 Vandegehuchte MW, Steppe K (2012) Sapflow+: a four-needle heat-pulse sap flow  
646 sensor enabling nonempirical sap flux density and water content measurements.  
647 *New Phytol* 196:306-317.

648 Watson MA, Casper BB (1984) Morphogenetic constraints on patterns of carbon  
649 distribution in plants. *Annual Review of Ecology and Systematics* 15:233-258.

650 Wheeler JK, Huggett BA, Tofte AN, Rockwell FE, Holbrook NM (2013) Cutting xylem  
651 under tension or supersaturated with gas can generate PLC and the appearance  
652 of rapid recovery from embolism. *Plant Cell Environ*

653 Wullschlegel SD, Meinzer FC, Vertessy RA (1998) A review of whole-plant water use  
654 studies in tree. *Tree Physiol* 18:499-512.

655 Zeppel MJB, Murray BR, Barton C, Eamus D (2004) Seasonal responses of xylem sap  
656 velocity to VPD and solar radiation during drought in a stand of native trees in  
657 temperate Australia. *Functional Plant Biology* 31:461

658Zhang YJ, Meinzer FC, Qi JH, Goldstein G, Cao KF (2013) Midday stomatal  
659 conductance is more related to stem rather than leaf water status in subtropical  
660 deciduous and evergreen broadleaf trees. *Plant Cell Environ* 36:149-158.

## Figure legends

Figure 1.

(a) Three days of sap flow for east- (dashed) and west-facing (solid) leaves. Tick marks on the horizontal axis indicate at midnight. (b) Boxplot of the time lag in sap flow rates between east- and west-facing leaves.

Figure 2.

(a) Eight days of sap flow for leaves (solid) and leaflets (dashed). The first five days corresponded to the end of a week without watering. Tick marks on the horizontal axis indicate at midnight. (b) Boxplot of the daily time-integrated sap flow through leaves and leaflets.

Figure 3.

The relationship between daily integrated sap flow and mean daily VPD for leaves (triangles) and leaflets (circles). Black points represent the last five days during the drought treatment. Grey points at the bottom mark the mean VPD (and standard error) at which maximum daily sap flow occurred for leaves and leaflets.

Figure 4.

The pairwise relationships between  $v_n$ , VPD, and PAR for two days (top and bottom rows). (a,d) The  $v_n$ -VPD relationship differed between the two days, as did the (b,e)  $v_n$ -PAR relationship. (c,f) However, the VPD-PAR relationship was approximately the same for the two days.

681

682 Table 1. Summary statistics for the linear regressions between integrated sap distance  
683 and mean VPD for leaves and leaflets in the day and in the night, whether including  
684 data from the week of drought or not.

685

|       |            | Leaves         |      |      |                 | Leaflets       |      |      |                  |
|-------|------------|----------------|------|------|-----------------|----------------|------|------|------------------|
|       |            | R <sup>2</sup> | t    | d.f. | P               | R <sup>2</sup> | t    | d.f. | P                |
| Day   | All        | 0.26           | 3.05 | 23   | <b>&lt;0.01</b> | 0.40           | 4.15 | 23   | <b>&lt;0.001</b> |
|       | No drought | 0.22           | 2.51 | 18   | <b>0.02</b>     | 0.20           | 2.42 | 18   | <b>0.03</b>      |
| Night | All        | 0.04           | 0.94 | 23   | 0.36            | 0.28           | 3.19 | 23   | <b>&lt;0.01</b>  |
|       | No drought | 0.02           | 0.55 | 18   | 0.59            | 0.13           | 1.98 | 18   | 0.06             |

686

## Figure legends

Figure 1. (a) Three days of sap flow for east- (dashed) and west-facing (solid) leaves. Tick marks on the horizontal axis indicate at midnight. (b) Boxplot of the time lag in sap flow rates between east- and west-facing leaves.

Figure 2. (a) Eight days of sap flow for leaves (solid) and leaflets (dashed). The first five days corresponded to the end of a week without watering. Tick marks on the horizontal axis indicate at midnight. (b) Boxplot of the daily time-integrated sap flow through leaves and leaflets.

Figure 3. The relationship between daily integrated sap flow and mean daily VPD for leaves (triangles) and leaflets (circles). Black points represent the last five days during the drought treatment. Grey points at the bottom mark the mean VPD (and standard error) at which maximum daily sap flow occurred for leaves and leaflets.

Figure 4. The pairwise relationships between  $v_h$ , VPD, and PAR for two days (top and bottom rows). (a,d) The  $v_h$ -VPD relationship differed between the two days, as did the (b,e)  $v_h$ -PAR relationship. (c,f) However, the VPD-PAR relationship was approximately the same for the two days.

Table 1. Summary statistics for the linear regressions between integrated sap distance and mean VPD for leaves and leaflets in the day and in the night, whether including data from the week of drought or not.

Figure 1

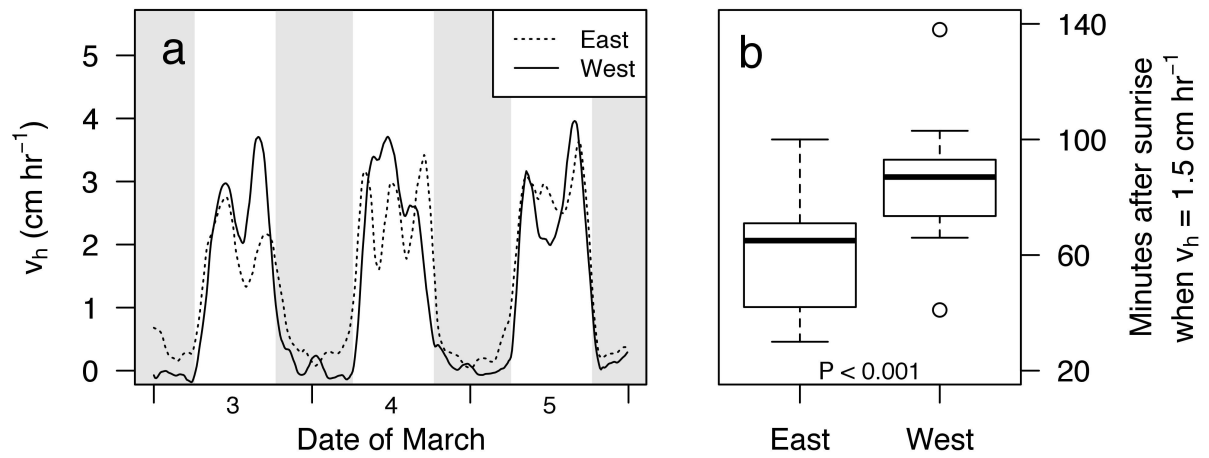

Figure 2

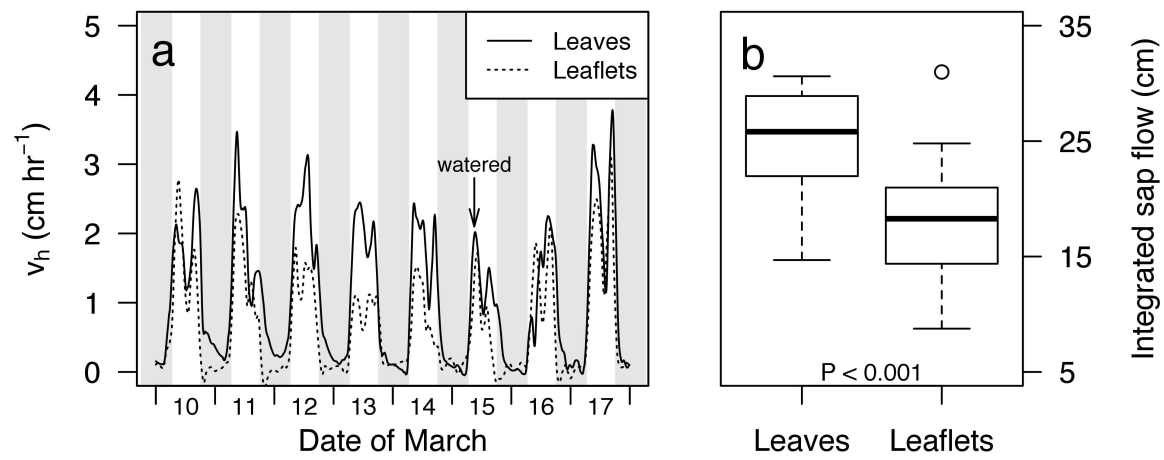

Figure 3

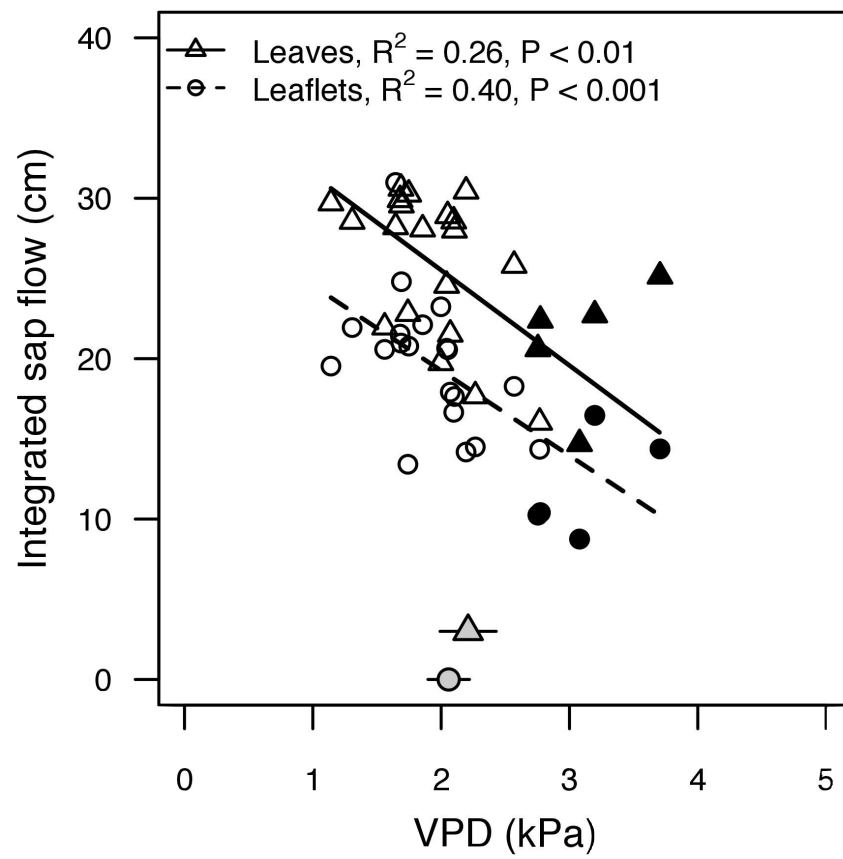



Figure 4

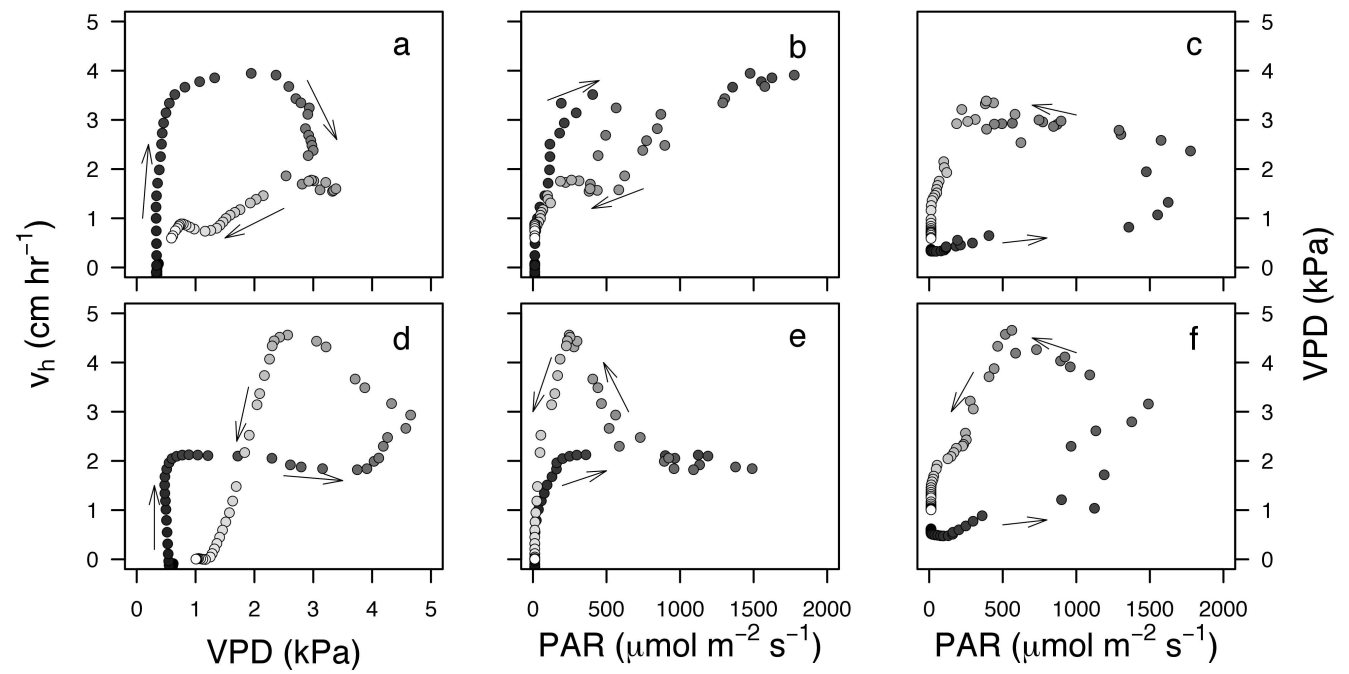

Table 1

|       |            | Leaves         |      |      |                 | Leaflets       |      |      |                  |
|-------|------------|----------------|------|------|-----------------|----------------|------|------|------------------|
|       |            | R <sup>2</sup> | t    | d.f. | P               | R <sup>2</sup> | t    | d.f. | P                |
| Day   | All        | 0.26           | 3.05 | 23   | <b>&lt;0.01</b> | 0.40           | 4.15 | 23   | <b>&lt;0.001</b> |
|       | No drought | 0.22           | 2.51 | 18   | <b>0.02</b>     | 0.20           | 2.42 | 18   | <b>0.03</b>      |
| Night | All        | 0.04           | 0.94 | 23   | 0.36            | 0.28           | 3.19 | 23   | <b>&lt;0.01</b>  |
|       | No drought | 0.02           | 0.55 | 18   | 0.59            | 0.13           | 1.98 | 18   | 0.06             |
